# Supplementary material for: Guest-induced narcissistic self-sorting in water via imine formation
Source: Royal Society of Chemistry journal article supplement (doi:10.1039/d4cc01239a), 2024-01-01
Supplement: d4cc01239a1.pdf [file d4cc01239a1.pdf]

## Guest-induced narcissistic self-sorting in water via imine formation

### Supporting information

Bingda Li<sup>a</sup>, Bin Sun<sup>a</sup>, Shuai Fang<sup>a</sup>, Yixin Chen<sup>a</sup> and Hao Li<sup>\*ab</sup>

[a] B. Li, B. Sun, S. Fang, Y. Chen, Prof. H. Li\*

Department of Chemistry, Zhejiang University

Hangzhou 310027 (China)

E-mail: lihao2015@zju.edu.cn

[b] Prof. H. Li\*

ZJU-Hangzhou Global Scientific and Technological Innovation Center

Hangzhou 311215 (China)

## 1. Materials and General Methods

All reagents and solvents were purchased from commercial sources and used without further purification. Manipulations were performed under a normal laboratory atmosphere unless otherwise noted. Nuclear magnetic resonance (NMR) spectra were recorded at ambient temperature using Bruker AVANCE NEO 600 spectrometers, with working frequencies of 600 and 150 MHz for  $^1\text{H}$  and  $^{13}\text{C}$ , respectively. Chemical shifts are reported in ppm relative to the residual internal non-deuterated solvent signals ( $\text{CDCl}_3$ :  $\delta=7.26$  ppm,  $\text{D}_2\text{O}$ :  $\delta=4.80$  ppm). High-resolution mass spectra (HRMS) were measured on either a Fourier transform ion cyclotron resonance mass spectrometry (FT-ICR MS) or a Ultraflex extreme MALDI-TOF/TOF.

## 2. Synthetic Procedures

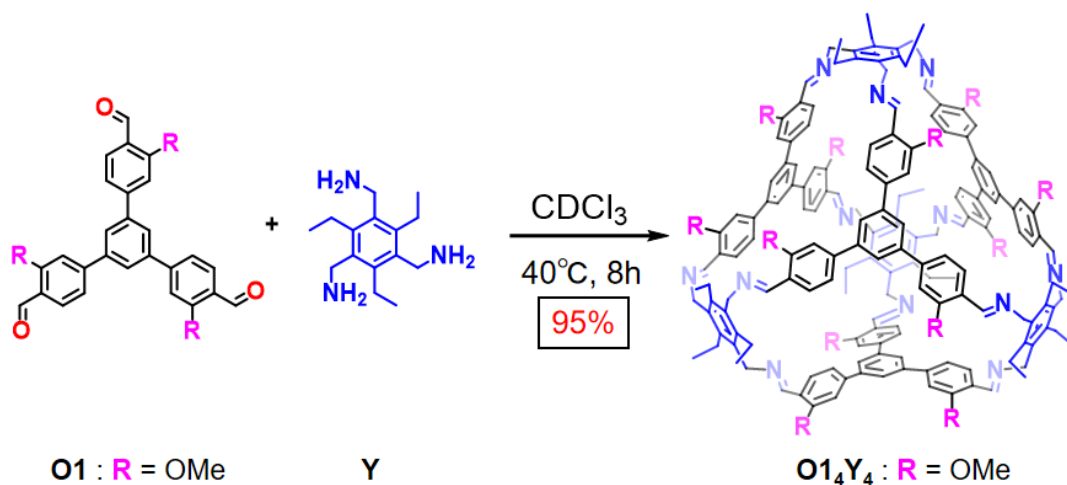

**Figure S1.** The synthesis of the tetrahedral cage **O1<sub>4</sub>Y<sub>4</sub>**.

**O1<sub>4</sub>Y<sub>4</sub>**: Trisbenzaldehyde **O1** (2.0 mg, 5.1  $\mu\text{mol}$ , 1.0 equiv.), which was prepared according to the literature procedures<sup>[1]</sup>, and **Y** (1.4 mg, 5.6  $\mu\text{mol}$ , 1.1 equiv.) were mixed in a  $\text{CDCl}_3$  solution. After the mixture was heated at 40 °C for 8 h, the corresponding tetrahedral cage **O1<sub>4</sub>Y<sub>4</sub>** was formed as the only observable product without further purification. Removal of the solvent yielded the pure cage sample with a yield of 95%.  $^1\text{H}$  NMR (600 MHz,  $\text{CDCl}_3$ )  $\delta$  8.68 (s, 12H), 7.98 (d,  $J=8.0$  Hz, 12H), 7.54 (s, 12H), 7.07 (d,  $J=8.0$  Hz, 12H), 6.97 (s, 12H), 4.93 (s, 24H), 3.90-3.86 (m, 24H), 3.72 (s, 36H), 2.89-2.77 (m, 36H).  $^{13}\text{C}$   $\{^1\text{H}\}$  NMR (150 MHz,  $\text{CDCl}_3$ )  $\delta$  157.88, 154.75, 143.24, 142.28, 141.32, 131.57, 126.95, 124.53, 123.45, 118.95, 108.33, 54.56, 28.68, 14.85. MALDI-MS:  $m/z$  calcd for  $[\text{M}+\text{H}]^+$   $[\text{C}_{180}\text{H}_{181}\text{N}_{12}\text{O}_{12}]^+$ , 2704.399, found 2704.847.

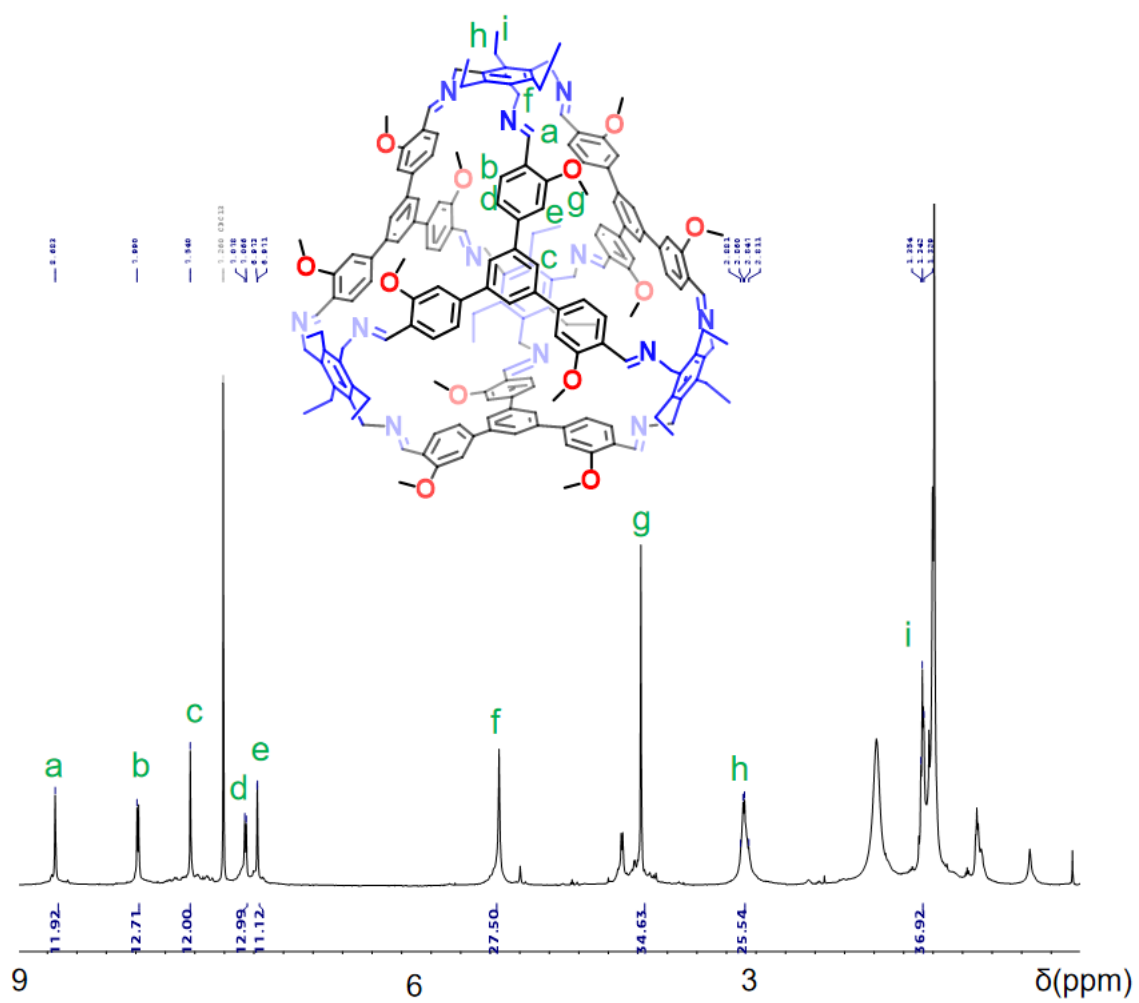

**Figure S2.** <sup>1</sup>H NMR spectrum (600 MHz, CDCl<sub>3</sub>, 298 K) of **O14Y4**.

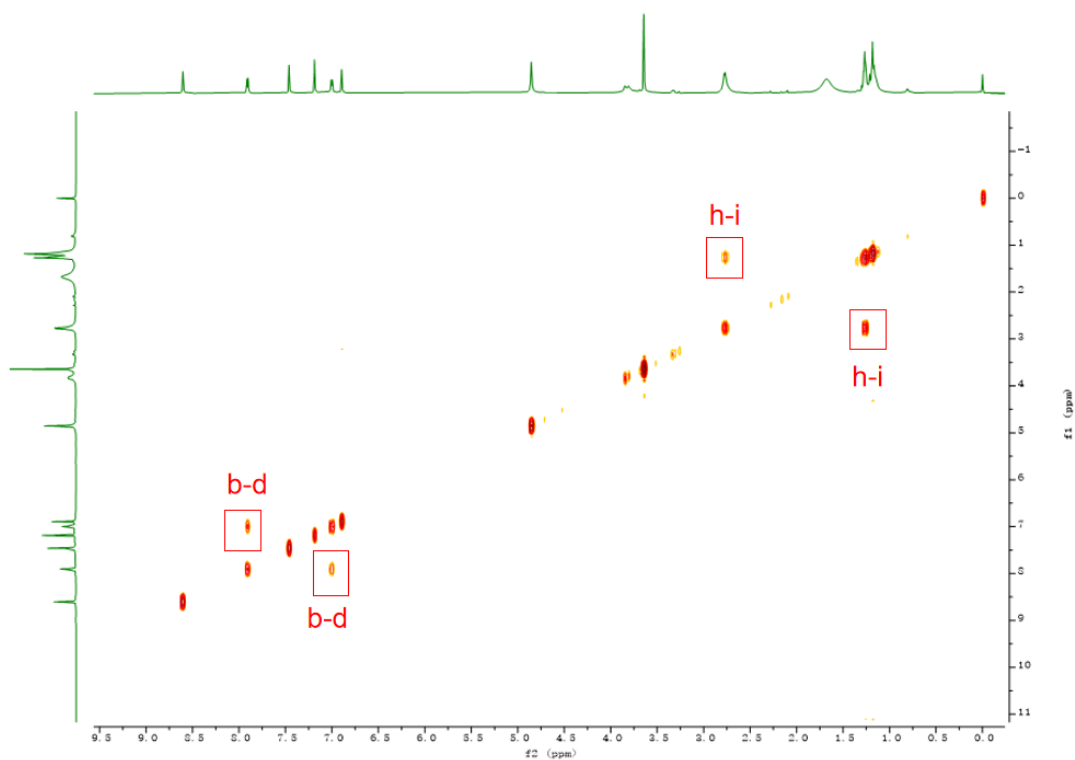

**Figure S3.**  $^1\text{H}$ - $^1\text{H}$  COSY spectrum (600 MHz,  $\text{CDCl}_3$ , 298 K) of **O14Y4**. The key correlation peaks are labelled in the spectrum.

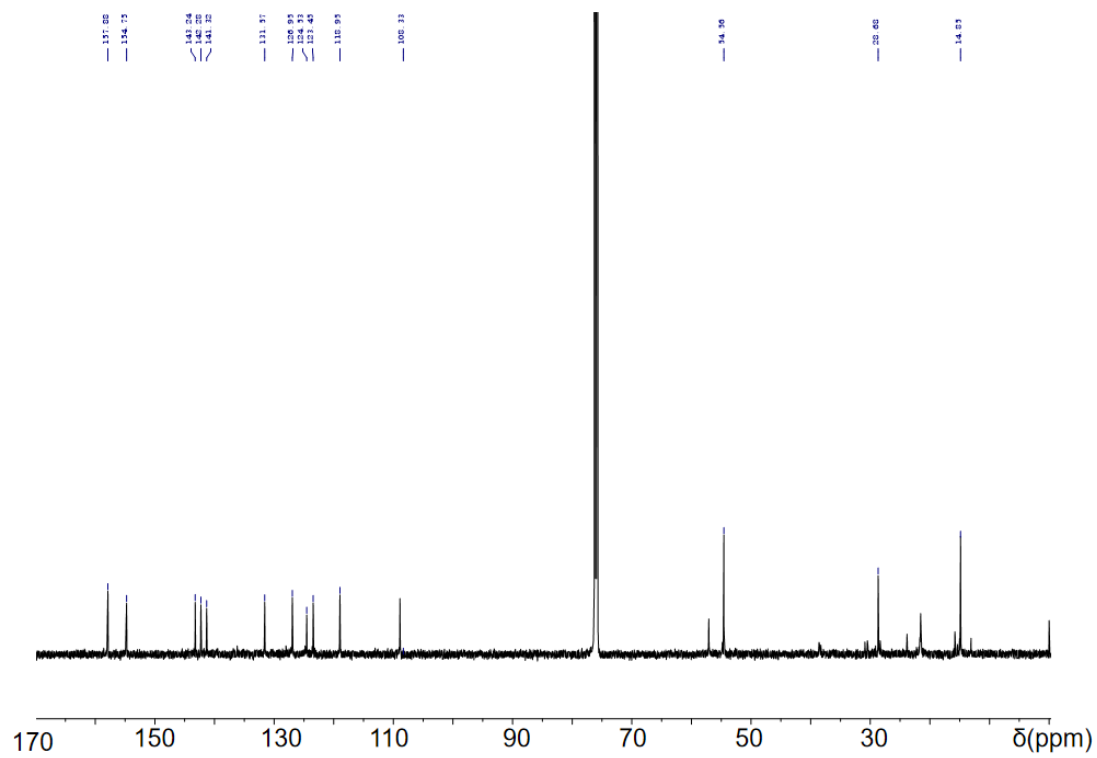

**Figure S4.**  $^{13}\text{C}$   $\{^1\text{H}\}$  NMR spectrum (150 MHz,  $\text{CDCl}_3$ , 298 K) of **O14Y4**.

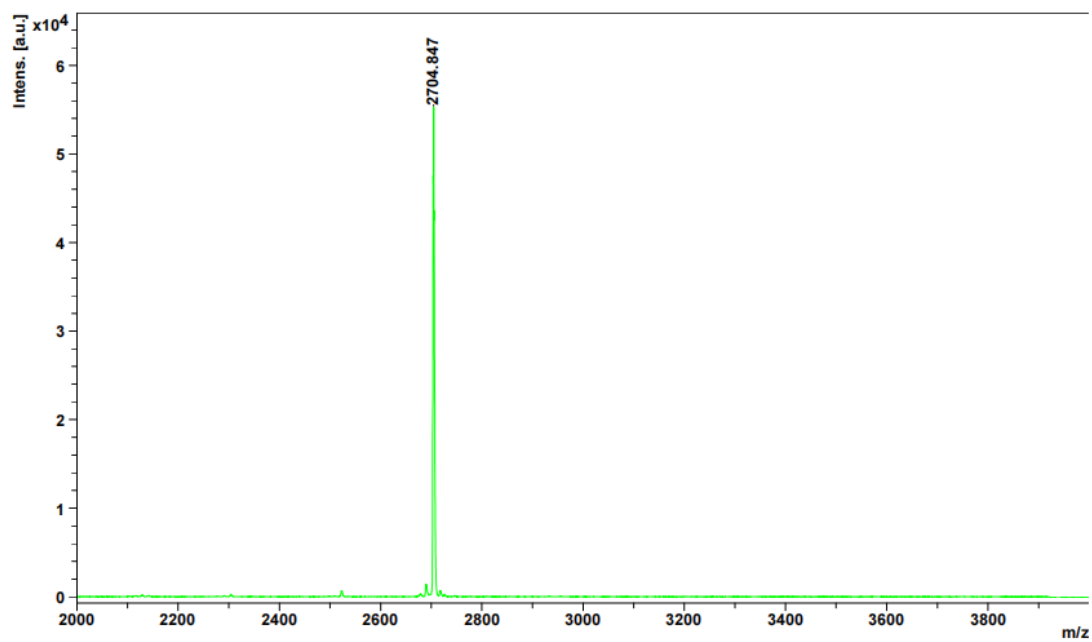

**Figure S5.** MALDI-MS of **O<sub>14</sub>Y<sub>4</sub>**: m/z calcd for [M+H]<sup>+</sup> [C<sub>180</sub>H<sub>181</sub>N<sub>12</sub>O<sub>12</sub>]<sup>+</sup>, 2704.399; found 2704.847.

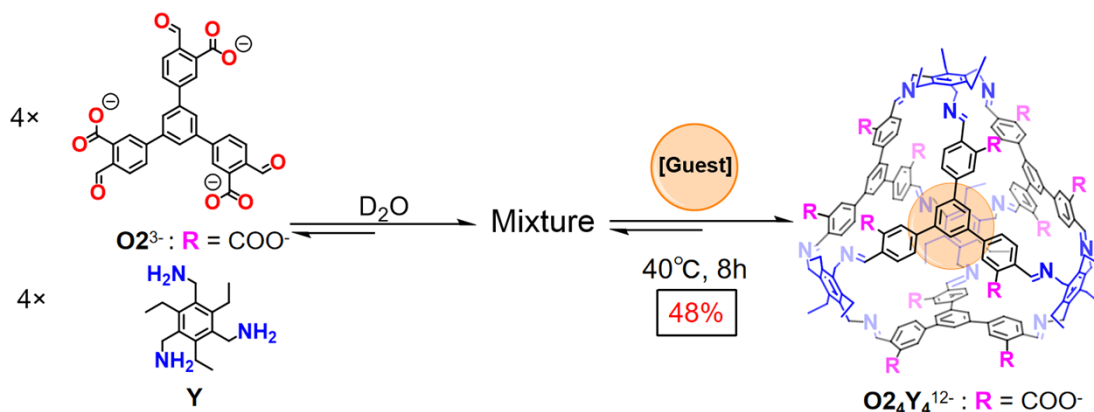

**Figure S6.** The synthesis of the tetrahedral cage  $\text{O}_{24}\text{Y}_4^{12-}$ .

$\text{O}_{24}\text{Y}_4^{12-}$ : To a  $\text{D}_2\text{O}$  (0.5 mL) solution containing  $\text{O}_2^{3-}\cdot 3\text{H}^+$  (2.0 mg, 3.8  $\mu\text{mol}$ , 1.0 equiv.), which was the protonated form of  $\text{O}_2^{3-}$  prepared according to the literature procedures<sup>[2]</sup>,  $\text{K}_2\text{CO}_3$  (2.0 mg, 0.014 mmol, 3.8 equiv), and  $(n\text{-C}_4\text{H}_9)_4\text{N}^+\cdot\text{Cl}^-$  (2.0 mg, 7.2  $\mu\text{mol}$ , 1.9 equiv.), **Y** (1.1 mg, 4.2  $\mu\text{mol}$ , 1.1 equiv.) in  $\text{D}_2\text{O}$  was added. The mixture was heated at 40 °C for 8 h.  $^1\text{H}$  NMR spectrum indicated that  $\text{O}_{24}\text{Y}_4^{12-}$  was obtained as the only observable products containing  $(n\text{-C}_4\text{H}_9)_4\text{N}^+$  in its cavity. The yield of this cage was determined to be 48% by using DMF as the internal standard.  $^1\text{H}$  NMR (600 MHz,  $\text{D}_2\text{O}$ )  $\delta$  9.01 (s, 12H), 8.02 (s, 12H), 7.96 (s, 12H), 7.90-7.88 (d,  $J=7.8$  Hz, 12H), 7.68-7.66 (d,  $J=7.8$  Hz, 12H), 5.00 (s, 24H), 4.00-3.97 (m, 24H), 1.23-1.17 (m, 36H). ESI-HRMS:  $m/z$  calcd for  $[\text{M}+5\text{K}^+]^7-$   $[\text{K}_5\text{C}_{180}\text{H}_{144}\text{N}_{12}\text{O}_{24}]^7-$ , 436.2672, found 436.2658.

Several trials to obtain the  $^{13}\text{C}$   $\{^1\text{H}\}$  NMR spectrum of  $\text{O}_{24}\text{Y}_4^{12-}$  were unsuccessful even though the sample was scanned for more than 10,000 times, probably because the solution of  $\text{O}_{24}\text{Y}_4^{12-}$  was too dilute to record its  $^{13}\text{C}$  NMR spectrum on account of its relatively low water-solubility.



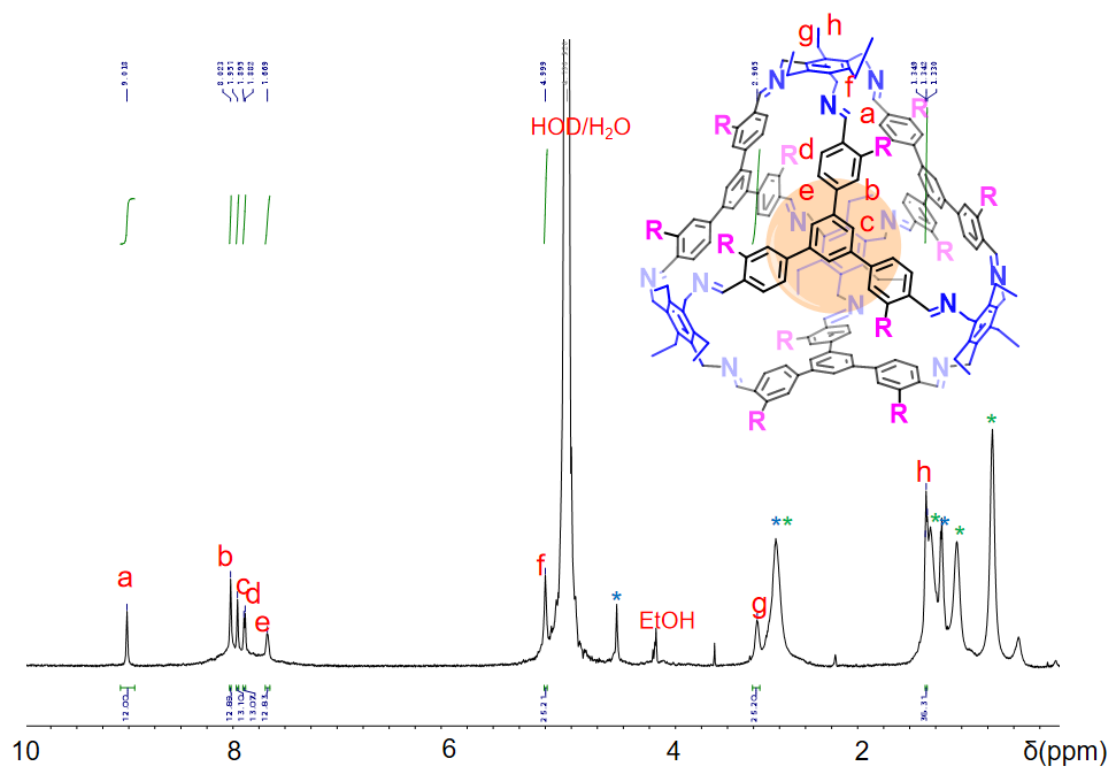

**Figure S7.**  $^1\text{H}$  NMR spectrum (600 MHz,  $\text{D}_2\text{O}$ , 298 K) of  $\text{O}_{24}\text{Y}_4^{12-}$ . The resonances corresponding to unreacted  $\text{Y}$  and  $(n\text{-C}_4\text{H}_9)_4\text{N}^+$  are labelled with blue and green asterisks, respectively.

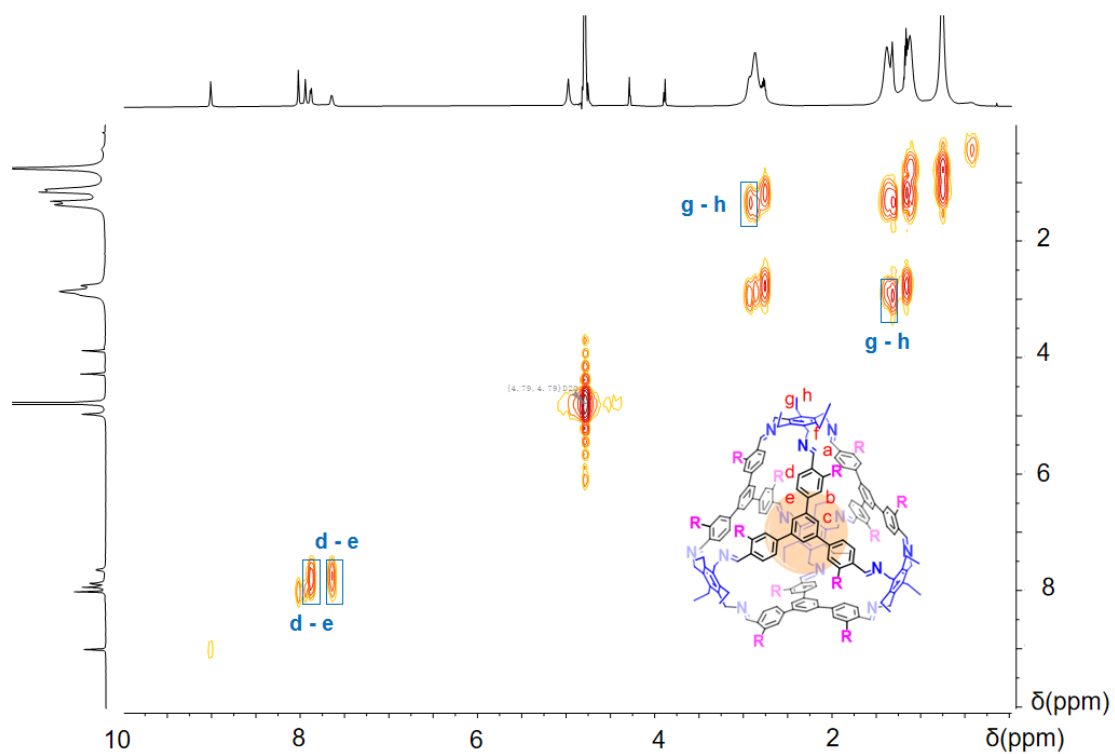

**Figure S8.** <sup>1</sup>H-<sup>1</sup>H COSY spectrum (600 MHz, D<sub>2</sub>O, 298 K) of **O<sub>24</sub>Y<sub>4</sub><sup>12-</sup>**. The key correlation peaks are labelled in the spectrum.

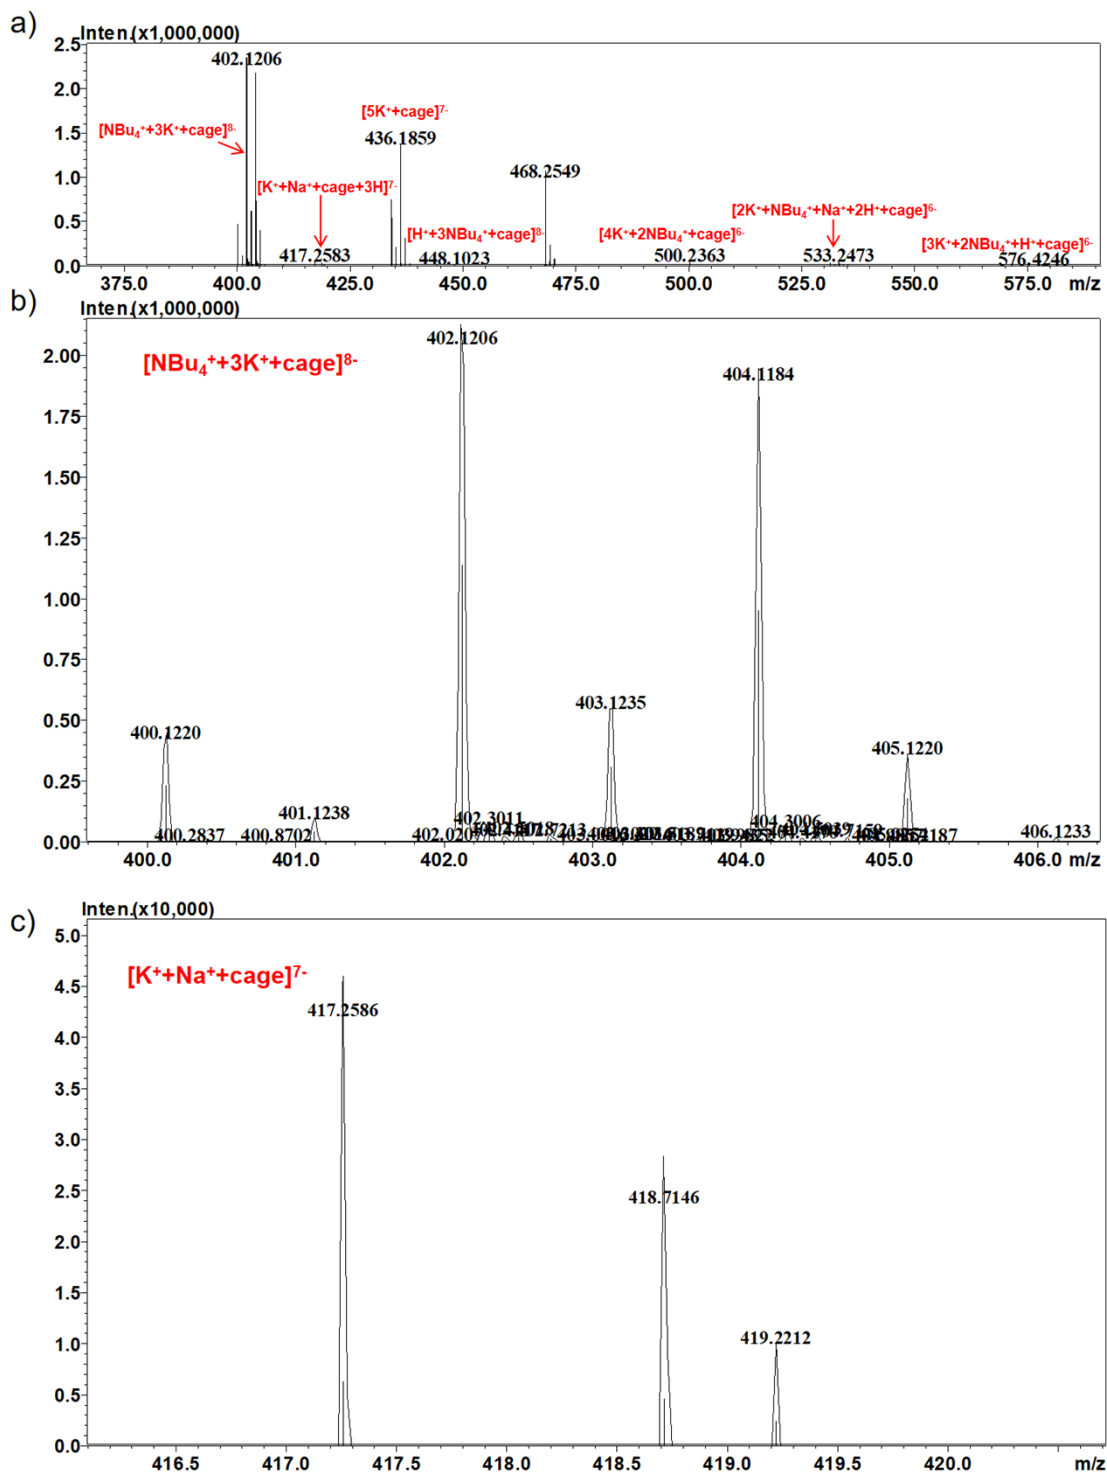

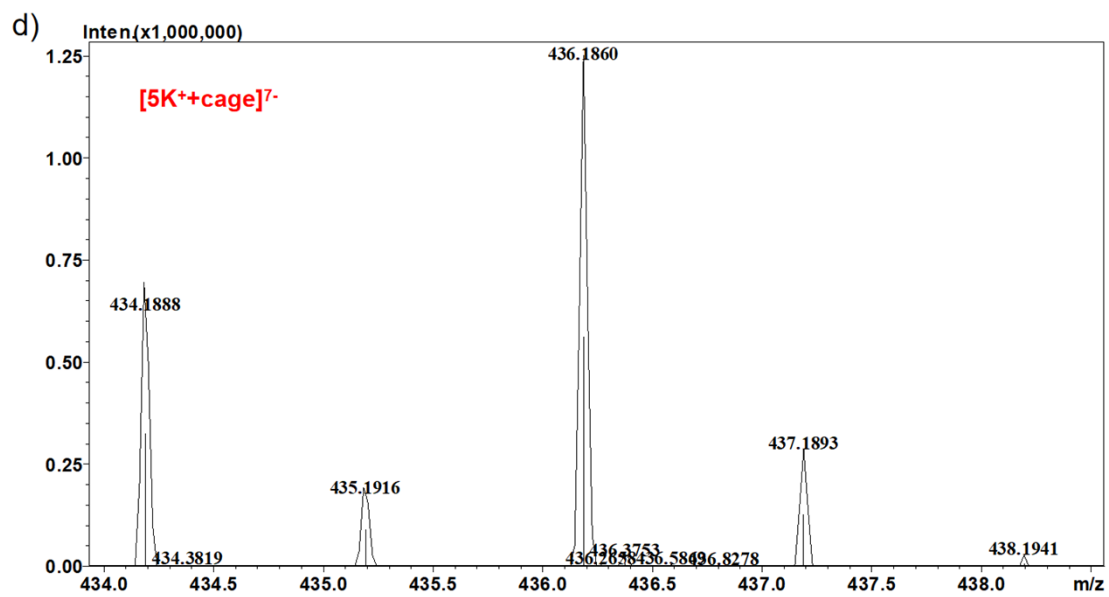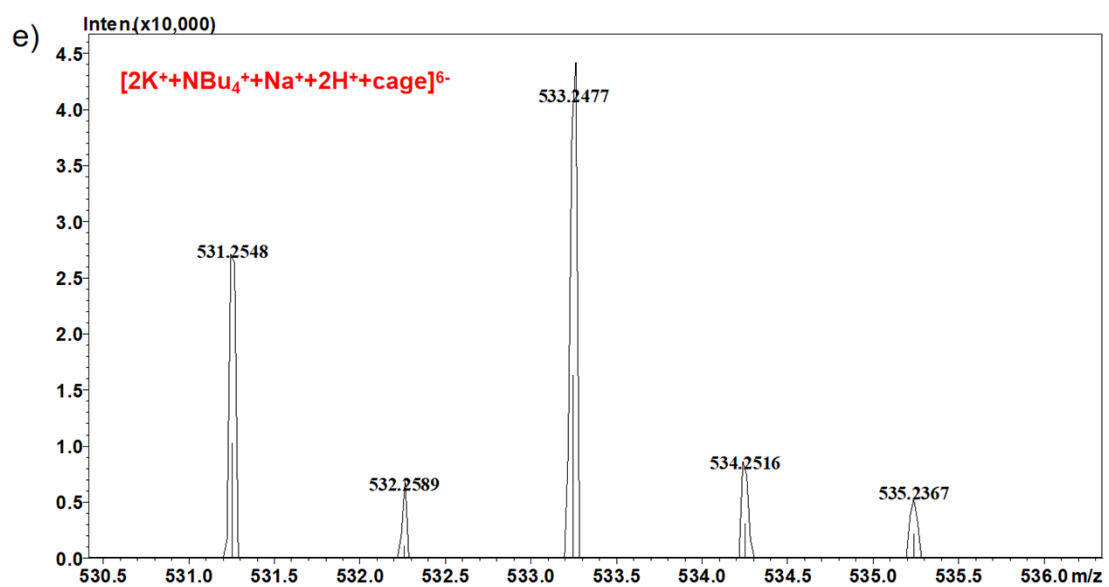

**Figure S9.** ESI-HRMS of  $O_2Y_4^{12-}$ .

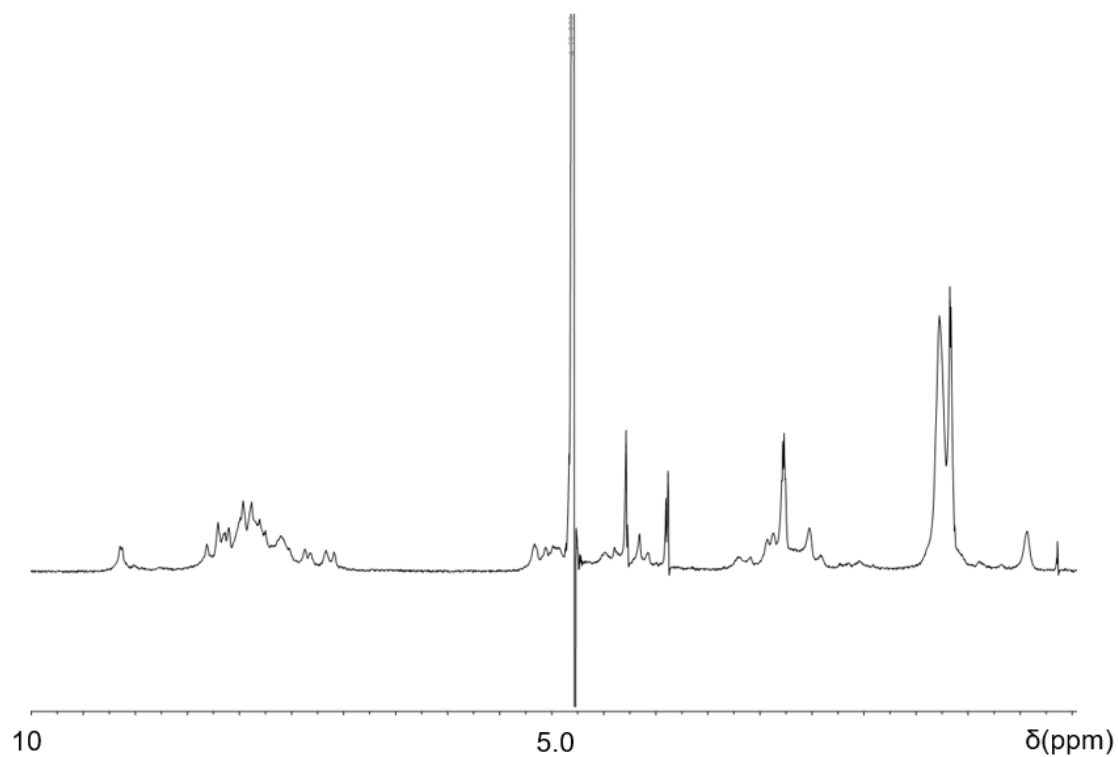

**Figure S10.** <sup>1</sup>H NMR spectrum (600 MHz, D<sub>2</sub>O, 298 K) of a reaction mixture of **O2<sup>3-</sup>·3H<sup>+</sup>** (2.0 mg, 3.8 μmol, 1.0 equiv.), K<sub>2</sub>CO<sub>3</sub> (2.0 mg, 0.014 mmol, 3.8 equiv.), and **Y** (1.1 mg, 4.2 μmol, 1.1 equiv.). The guest template (*n*-C<sub>4</sub>H<sub>9</sub>)<sub>4</sub>N<sup>+</sup>·Cl<sup>-</sup> was not added in this case, indicating that template is important in the cage formation.

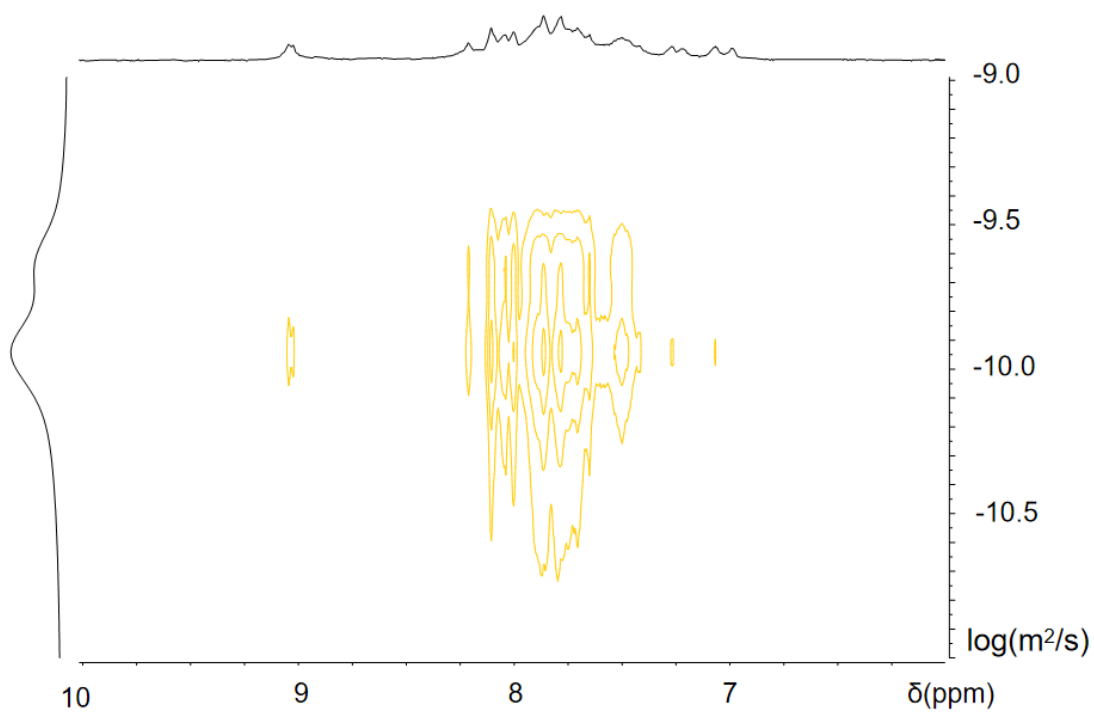

**Figure S11.** DOSY NMR spectrum (600 MHz,  $\text{D}_2\text{O}$ , 298 K) of a reaction mixture of  $\text{O}_2^{3-}\cdot 3\text{H}^+$  (2.0 mg, 3.8  $\mu\text{mol}$ , 1.0 equiv.),  $\text{K}_2\text{CO}_3$  (2.0 mg, 0.014 mmol, 3.8 equiv.), and **Y** (1.1 mg, 4.2  $\mu\text{mol}$ , 1.1 equiv.).

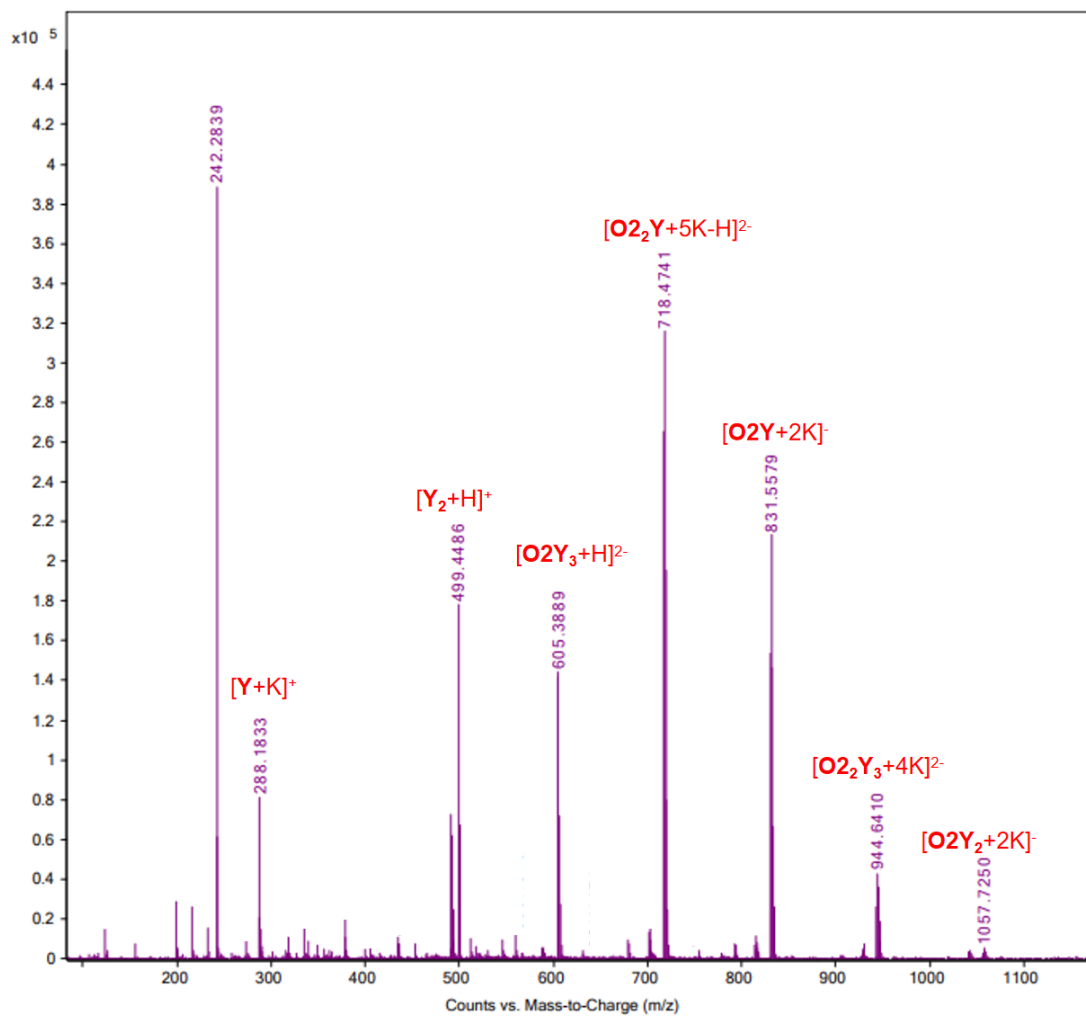

**Figure S12.** ESI-MS of the reaction mixture of  $O_2^{3-}+3H^+$  (2.0 mg, 3.8  $\mu\text{mol}$ , 1.0 equiv.),  $K_2CO_3$  (2.0 mg, 0.014 mmol, 3.8 equiv.), and  $Y$  (1.1 mg, 4.2  $\mu\text{mol}$ , 1.1 equiv.).

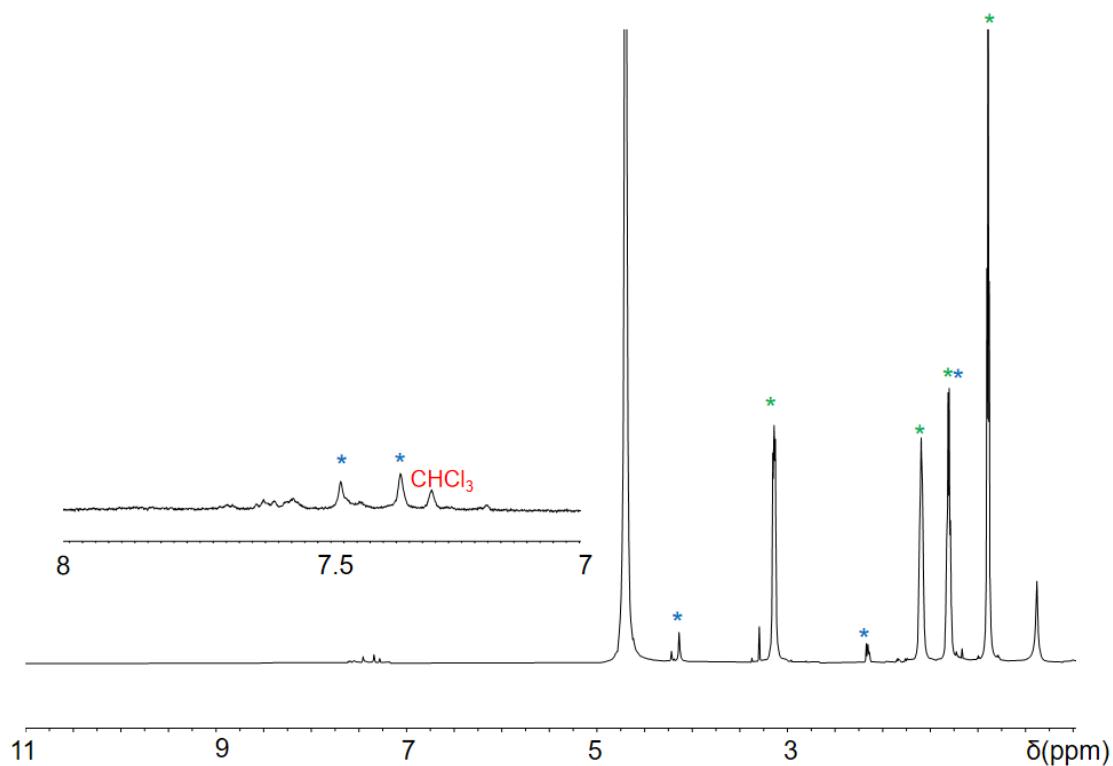

**Figure S13.** <sup>1</sup>H NMR spectrum (600 MHz, D<sub>2</sub>O, 298 K) of the reaction mixture of **O2**<sup>3-</sup>•3H<sup>+</sup> (2.0 mg, 3.8 μmol, 1.0 equiv.), K<sub>2</sub>CO<sub>3</sub> (2.0 mg, 0.014 mmol, 3.8 equiv), benzene-1,3,5-triyltrimethanamine (1.1 mg, 4.2 μmol, 1.1 equiv.) and (*n*-C<sub>4</sub>H<sub>9</sub>)<sub>4</sub>N<sup>+</sup>•Cl<sup>-</sup> (2.0 mg, 7.2 μmol, 1.9 equiv.). The resonances corresponding to unreacted benzene-1,3,5-triyltrimethanamine and (*n*-C<sub>4</sub>H<sub>9</sub>)<sub>4</sub>N<sup>+</sup> are labelled with blue and green asterisks.



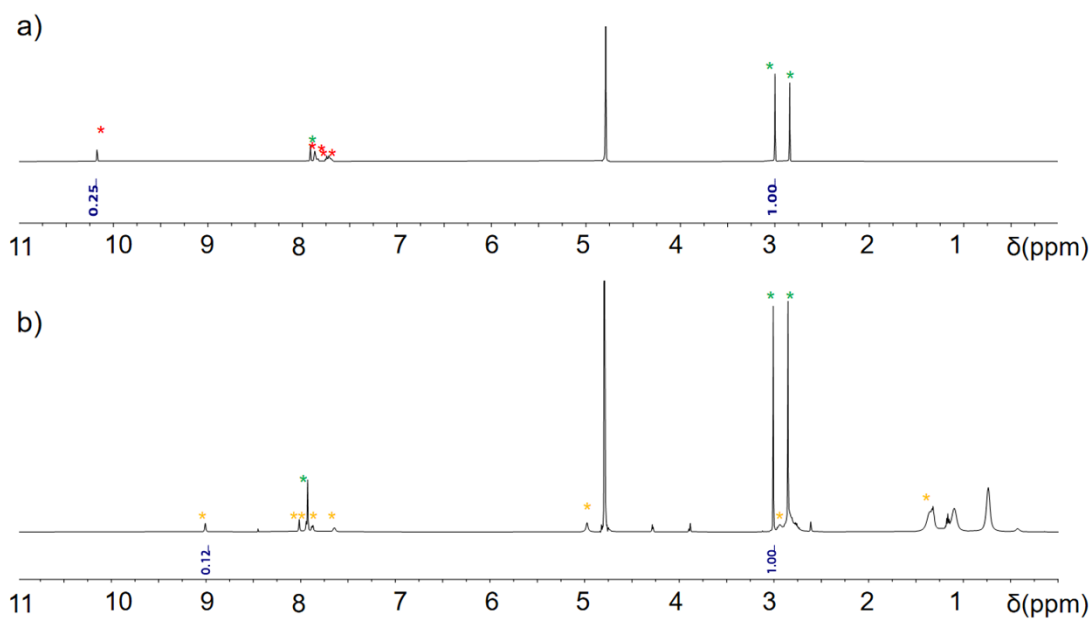

**Figure S14.** The  $^1\text{H}$  NMR spectra (600 MHz,  $\text{D}_2\text{O}$ , 298 K) of a) a mixture of  $\text{O}_2^{3-}$  and DMF (as internal standard) a) before and b) after  $(n\text{-C}_4\text{H}_9)_4\text{N}^+\cdot\text{Cl}^-$  and **Y** were added into the solution. The resonances corresponding to  $\text{O}_2^{3-}$  in a) and  $\text{O}_2\text{Y}_4^{12-}$  in b) were integrated relative to one resonance corresponding to DMF, whose concentrations are identical in both spectra. The self-assembly yield of  $\text{O}_2\text{Y}_4^{12-}$  was calculated to be  $0.12/0.25$ , which is 48%. The resonances corresponding to  $\text{O}_2^{3-}$ ,  $\text{O}_2\text{Y}_4^{12-}$  and DMF are labelled with red, yellow and green asterisks, respectively.

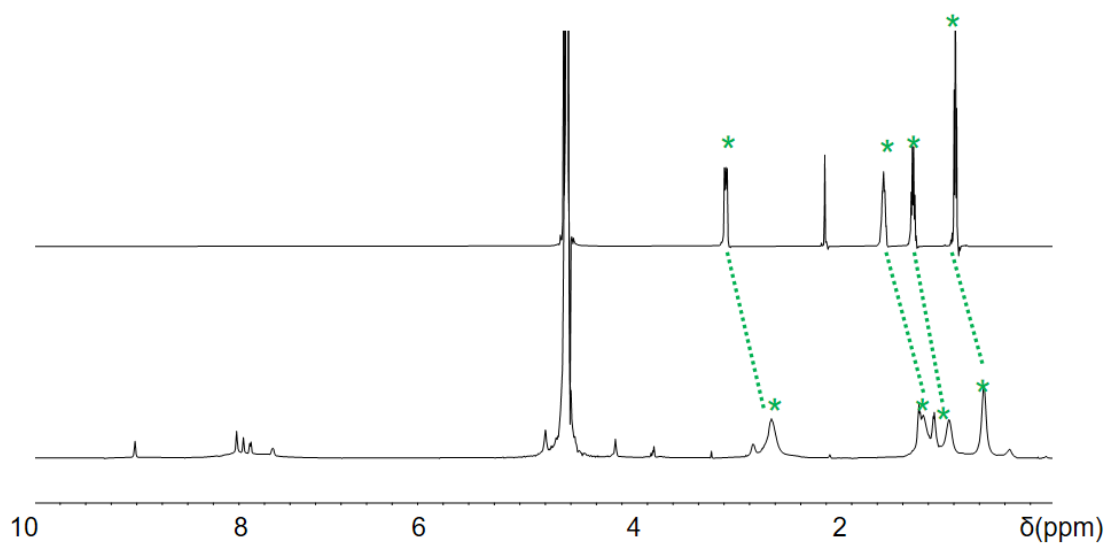

**Figure S15.** The <sup>1</sup>H NMR spectra (600 MHz, D<sub>2</sub>O, 298 K) of (n-C<sub>4</sub>H<sub>9</sub>)<sub>4</sub>N<sup>+</sup> (top) and O<sub>24</sub>Y<sub>4</sub><sup>12-</sup> (bottom) whose formation was templated by using (n-C<sub>4</sub>H<sub>9</sub>)<sub>4</sub>N<sup>+</sup>.

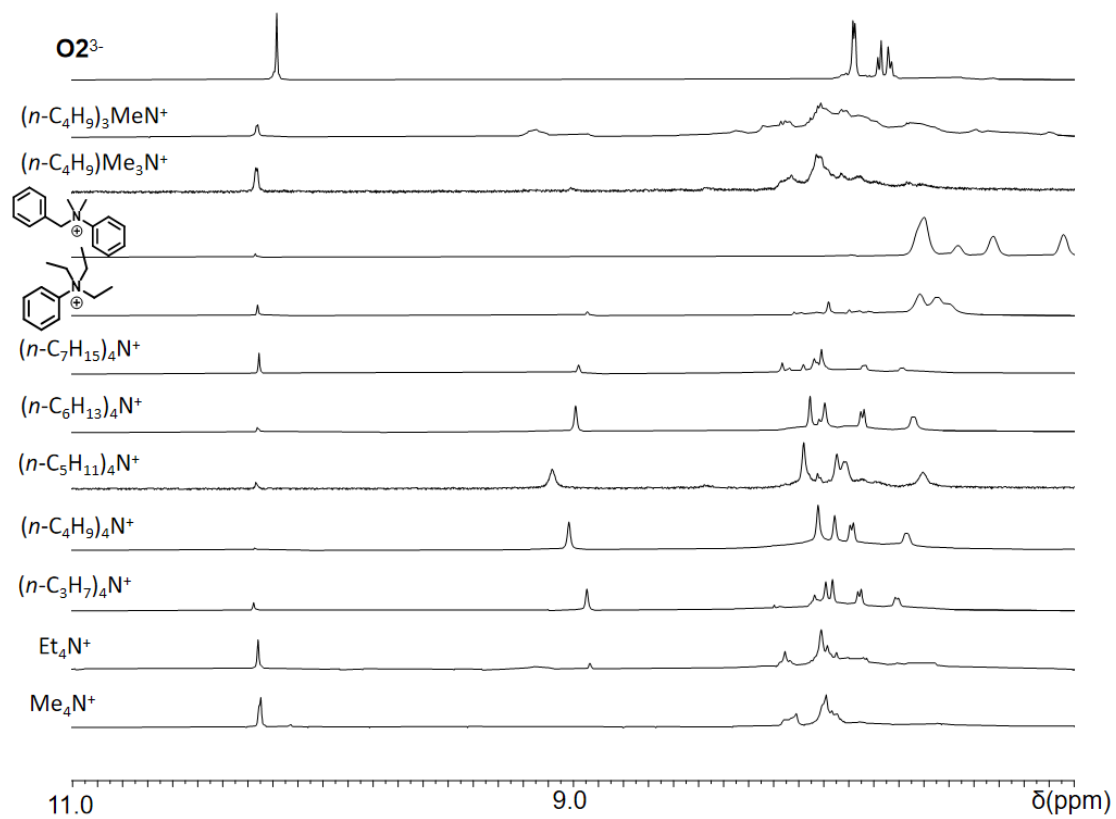

**Figure S16.** The  $^1\text{H}$  NMR spectra (600 MHz,  $\text{D}_2\text{O}$ , 298K) of mixtures of  $\text{O2}^{3-}$  and  $\text{Y}$ , in the presence of different tetraalkylammonium cations, which was labelled in the corresponding spectra.

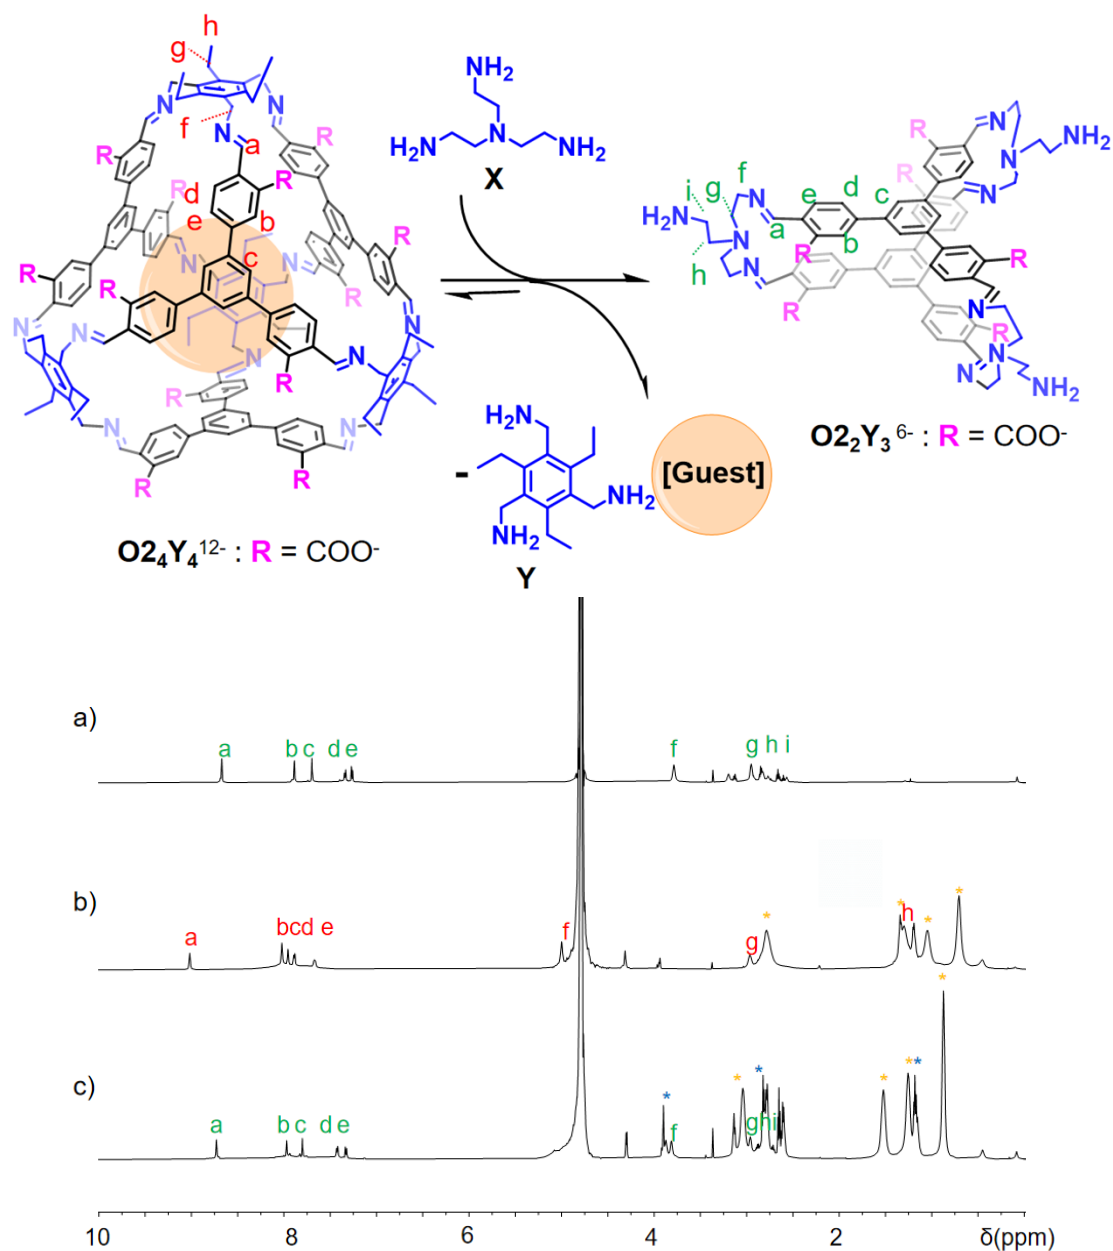

**Figure S17.** Partial <sup>1</sup>H NMR spectra (600 MHz, D<sub>2</sub>O, 298 K) of a) **O<sub>2</sub>X<sub>3</sub><sup>6-</sup>**, b) **O<sub>2</sub>Y<sub>4</sub><sup>12-</sup>** containing (*n*-C<sub>4</sub>H<sub>9</sub>)<sub>4</sub>N<sup>+</sup> as the template, and c) the reaction mixture of the sample in b) and **X**. The spectrum in c) indicated that **O<sub>2</sub>Y<sub>4</sub><sup>12-</sup>** was transformed into **O<sub>2</sub>X<sub>3</sub><sup>6-</sup>**, after adding **X**, during which (*n*-C<sub>4</sub>H<sub>9</sub>)<sub>4</sub>N<sup>+</sup> and **Y** were released. The resonances corresponding to (*n*-C<sub>4</sub>H<sub>9</sub>)<sub>4</sub>N<sup>+</sup> and **Y** were labelled with yellow and blue asterisks, respectively. The resonances corresponding to **O<sub>2</sub>X<sub>3</sub><sup>6-</sup>** and **O<sub>2</sub>Y<sub>4</sub><sup>12-</sup>** were labelled with green and red letters, respectively.

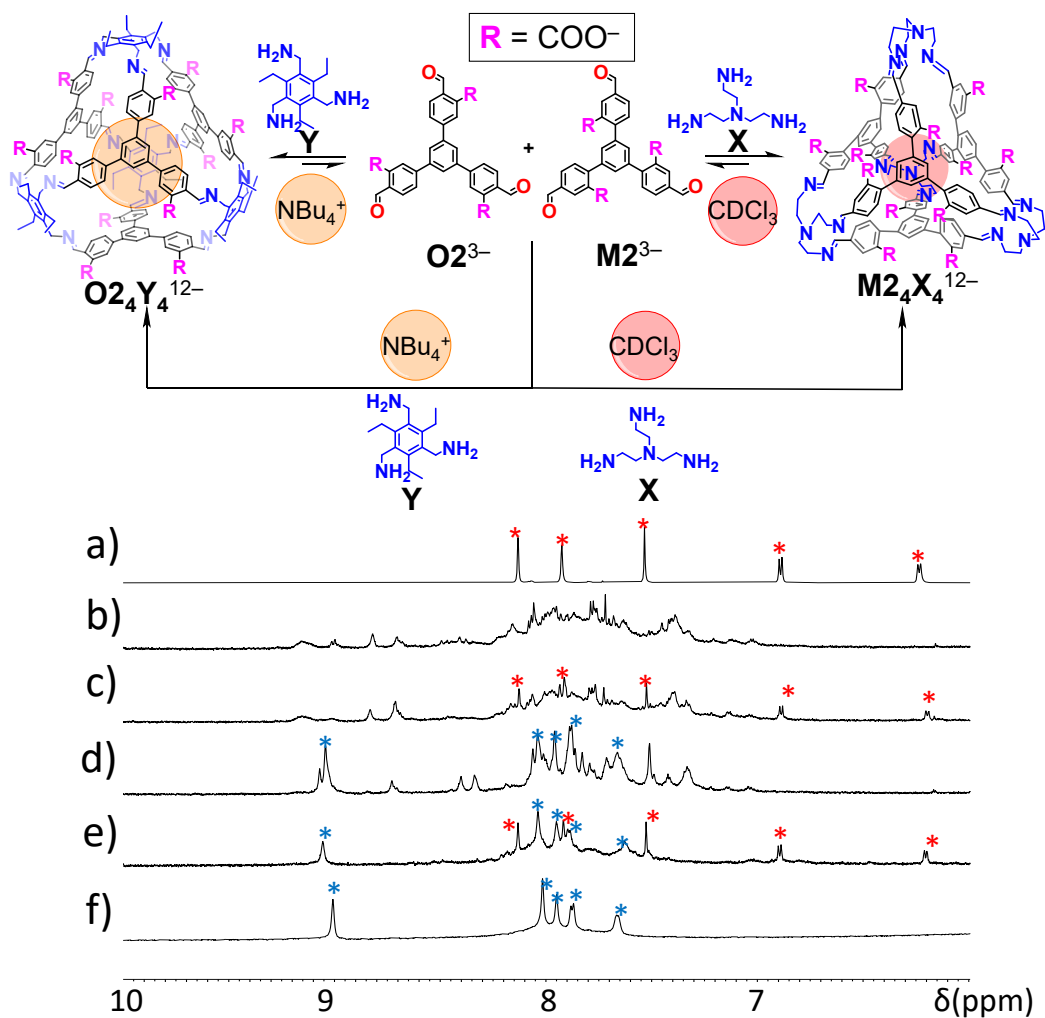

**Figure S18.** Partial  $^1\text{H}$  NMR spectra (600 MHz,  $\text{D}_2\text{O}$ , 298 K) of a)  $\text{M}2_4\text{X}_4^{12-}$  and f)  $\text{O}2_4\text{Y}_4^{12-}$ , b) a 2:1:2:1 mixture of **Y**, **X**,  $\text{O}2_4\text{Y}_4^{12-}$  and  $\text{M}2_4\text{X}_4^{12-}$ , and the samples by adding c)  $\text{CDCl}_3$ , d)  $(n\text{-C}_4\text{H}_9)_4\text{N}^+\text{Cl}^-$ , as well as e)  $\text{CDCl}_3$  and  $(n\text{-C}_4\text{H}_9)_4\text{N}^+\text{Cl}^-$  into the sample in b). The resonances corresponding to  $\text{M}2_4\text{X}_4^{12-}$  and  $\text{O}2_4\text{Y}_4^{12-}$  were labelled with red and blue asterisks, respectively.

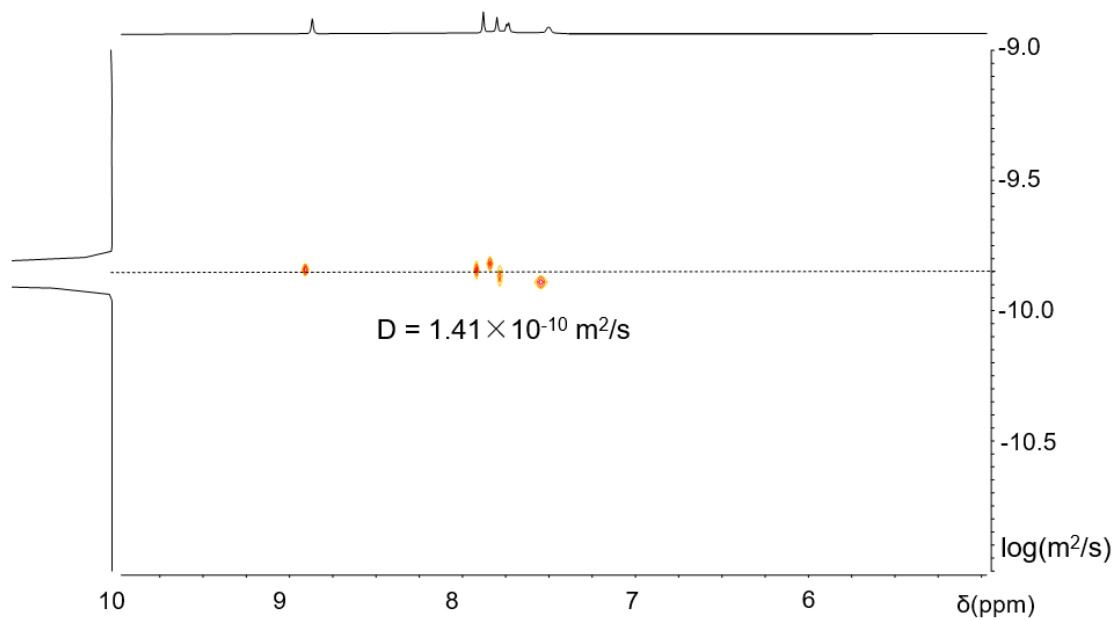

**Figure S19.** Partial  $^1\text{H}$  DOSY spectrum (600 MHz,  $\text{D}_2\text{O}$ , 298 K) of  $\text{M}_{24}\text{X}_4^{12-}$ .

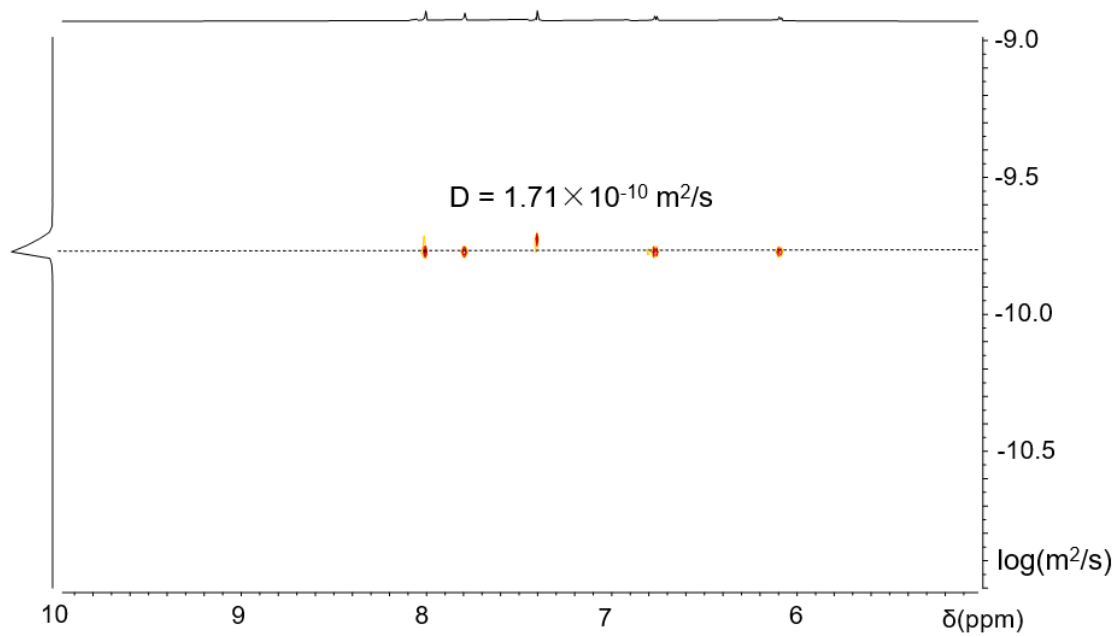

**Figure S20.** Partial  $^1\text{H}$  DOSY spectrum (600 MHz,  $\text{D}_2\text{O}$ , 298 K) of  $\text{O}_2\text{Y}_4^{12-}$ .

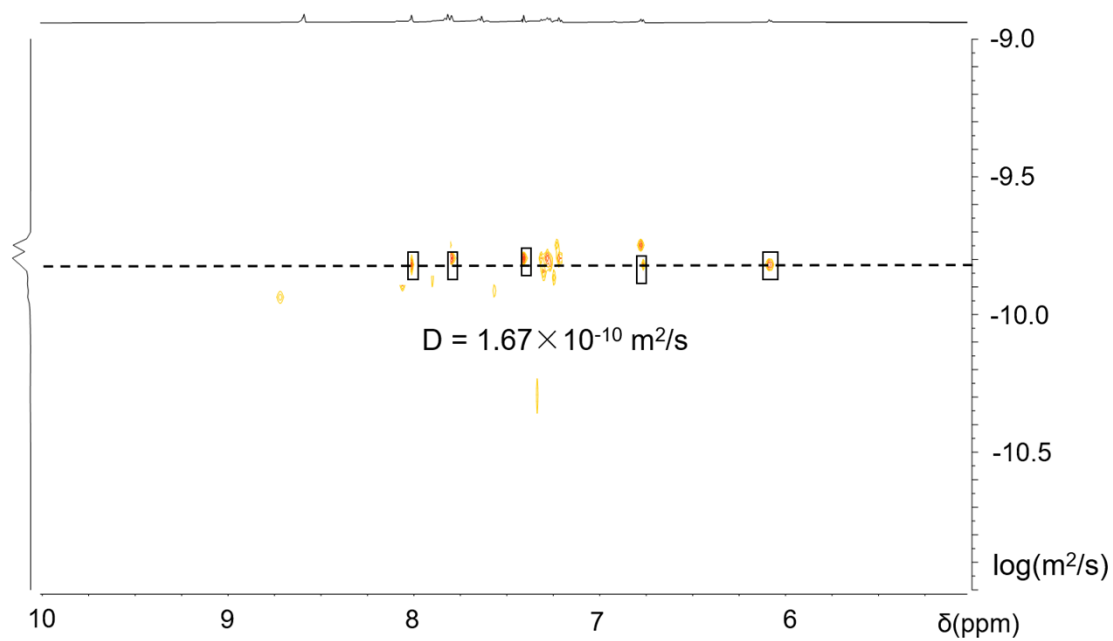

**Figure S21.** Partial  $^1\text{H}$  DOSY spectrum (600 MHz,  $\text{D}_2\text{O}$ , 298 K) of a mixture of **M2**, **O2**, **X**, **Y** followed by adding  $\text{CDCl}_3$  into the sample. The resonances corresponding to  $\text{M}_2\text{X}_4^{12-}$  were marked.



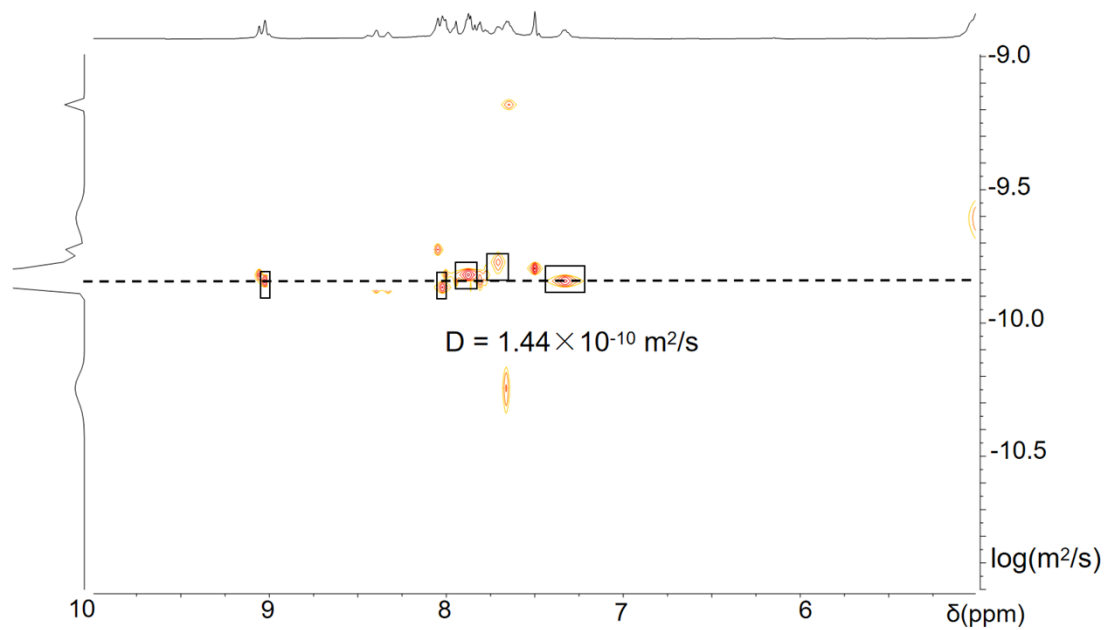

**Figure S22.** Partial  $^1\text{H}$  DOSY spectrum (600 MHz,  $\text{D}_2\text{O}$ , 298 K) of a mixture of **M2**, **O2**, **X**, **Y** followed by adding  $(n\text{-C}_4\text{H}_9)_4\text{N}^+\cdot\text{Cl}^-$  into the sample. The resonances corresponding to  $\text{O2}_4\text{Y}_4^{12-}$  were marked.

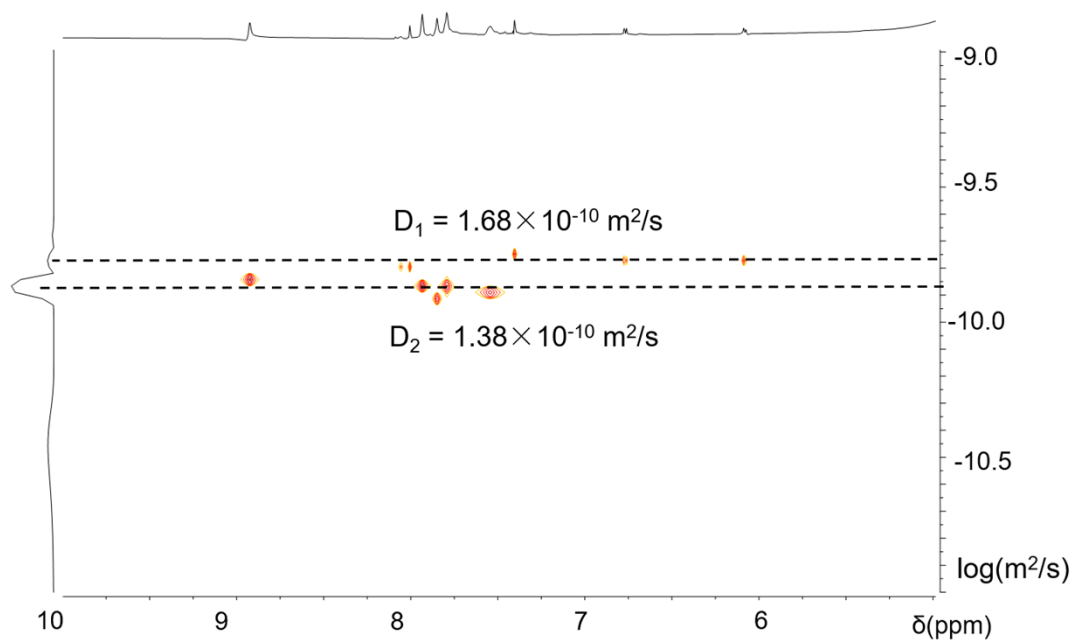

**Figure S23.** Partial  $^1\text{H}$  DOSY spectrum (600 MHz,  $\text{D}_2\text{O}$ , 298 K) of a mixture of **M2**, **O2**, **X**, **Y** followed by adding  $(n\text{-C}_4\text{H}_9)_4\text{N}^+\cdot\text{Cl}^-$  and  $\text{CDCl}_3$  into the sample. The resonances corresponding to **M2<sub>4</sub>X<sub>4</sub><sup>12-</sup>** and **O2<sub>4</sub>Y<sub>4</sub><sup>12-</sup>** were marked.

**Figure S24.** Partial  $^1\text{H}$  NMR spectra (600 MHz,  $\text{CDCl}_3$ , 298 K) of a) **M1<sub>4</sub>X<sub>4</sub>** and c) **O1<sub>4</sub>Y<sub>4</sub>**, as well as b) a 1:2:1:2 mixture of **M1**, **O1**, **X** and **Y**. The spectrum in b) indicated that only **M1<sub>4</sub>X<sub>4</sub>** was self-assembled, while **O1<sub>4</sub>Y<sub>4</sub>** was not.

**Figure S25.** Partial  $^1\text{H}$  NMR spectra (600 MHz,  $\text{CDCl}_3$ , 298 K) of a) **O1<sub>4</sub>Y<sub>4</sub>**, c)  $(n\text{-C}_4\text{H}_9)_4\text{N}^+$ , and b) a mixture of **O1<sub>4</sub>Y<sub>4</sub>** and  $(n\text{-C}_4\text{H}_9)_4\text{N}^+$ . The spectrum in b) indicated that in organic solvent namely  $\text{CDCl}_3$ , **O1<sub>4</sub>Y<sub>4</sub>** could not recognize  $(n\text{-C}_4\text{H}_9)_4\text{N}^+$  on account of the absence of hydrophobic effect.

## References

- [1] Y. Zhang, Y. Zhao, C. Zhang, X. Luo, X. Liu, *CrystEngComm* **2022**, *24*, 4496-4499.
- [2] Y. Chen, G. Wu, B. Chen, H. Qu, T. Jiao, Y. Li, C. Ge, C. Zhang, L. Liang, X. Zeng, X. Cao, Q. Wang, H. Li, *Angew. Chem. Int. Ed.* **2021**, *60*, 18815-18820.
